# Supplementary material for: Remembered Meal Satisfaction, Satiety, and Later Snack Food Intake: A Laboratory Study
Source: PubMed Central journal article supplement (PMC6316284; doi:10.3390/nu10121883), 2018-12-03
Supplement: nutrients-10-01883-s001.pdf [file nutrients-10-01883-s001.pdf]

Supplementary materials for ‘Remembered Meal Satisfaction, Satiety and Later Snack Food Intake: A Laboratory Study.’

**Table S1.** Correlation matrix for memory for satisfaction with the lunchtime meal questions.

|   | 1) Overall, how satisfying did you find the lunchtime meal? | 2) Overall, how dissatisfying did you find the lunchtime meal? | 3) How satisfied were you with how filling the lunchtime meal was? | 4) How dissatisfied were you with how filling the lunchtime meal was? | 5) How satisfied were you with the taste of the lunchtime meal? | 6) How dissatisfied were you with the taste of the lunchtime meal? | 7) I liked the lunchtime meal |
|---|-------------------------------------------------------------|----------------------------------------------------------------|--------------------------------------------------------------------|-----------------------------------------------------------------------|-----------------------------------------------------------------|--------------------------------------------------------------------|-------------------------------|
| 1 |                                                             | -.87**                                                         | .30**                                                              | -.30**                                                                | .84**                                                           | -.76**                                                             | .83**                         |
| 2 |                                                             |                                                                | -.25**                                                             | .37**                                                                 | -.76**                                                          | .81**                                                              | -.76**                        |
| 3 |                                                             |                                                                |                                                                    | -.84**                                                                | .21*                                                            | -.18*                                                              | .31**                         |
| 4 |                                                             |                                                                |                                                                    |                                                                       | -.16                                                            | .22*                                                               | -.29**                        |
| 5 |                                                             |                                                                |                                                                    |                                                                       |                                                                 | -.87**                                                             | .81**                         |
| 6 |                                                             |                                                                |                                                                    |                                                                       |                                                                 |                                                                    | -.75**                        |

\* indicates  $p < .05$ , \*\* indicates  $p < .01$

### Sensitivity analyses

Excluding those who expected satisfaction with the meal to influence snack intake did not alter the effect of condition on snack intake,  $F(2,122) = 0.85$ ,  $p = 0.43$ ,  $\eta^2 = 0.01$ . Including BMI as a covariate did not affect the result for snack intake,  $F(1,124) = 0.66$ ,  $p = 0.52$ ,  $\eta^2 = 0.01$ , neither did including cognitive restraint,  $F(2,124) = 0.50$ ,  $p = 0.61$ ,  $\eta^2 = 0.01$ , or uncontrolled eating,  $F(2,124) = 0.53$ ,  $p = 0.59$ ,  $\eta^2 = 0.01$ .

### Exploratory analyses

After excluding participants who did not complete the rehearsal task as fully intended ( $n = 16$  satisfying rehearsal condition,  $n = 12$  dissatisfying rehearsal condition) the effect of the rehearsal condition on ad libitum snack food intake remained non-significant,  $F(2,97) = .43$ ,  $p = 0.65$ ,  $\eta^2 = 0.01$ . See Table S2.

**Table S2.** Snack food intake as a function of recoded rehearsal condition.

|                          | Neutral rehearsal  | Satisfying rehearsal | Dissatisfying rehearsal |
|--------------------------|--------------------|----------------------|-------------------------|
|                          | mean ( <i>SD</i> ) | mean ( <i>SD</i> )   | mean ( <i>SD</i> )      |
|                          | $n = 44$           | $n = 27$             | $n = 29$                |
| Snack food intake (kcal) | 325.49 (156.57)    | 302.66 (148.00)      | 342.19 (176.46)         |
